# Supplementary material for: In situ extracted poly(acrylic acid) contributing to electrospun nanofiber separators with precisely tuned pore structures for ultra-stable lithium–sulfur batteries
Source: Royal Society of Chemistry journal article supplement (doi:10.1039/c8ta11397a), 2019-01-01
Supplement: c8ta11397a1.pdf [file c8ta11397a1.pdf]

## Supporting Information

**In-situ extracted poly(acrylic acid) contributing to electrospun nanofiber separators with precisely tuned pore structures for ultra-stable lithium-sulfur batteries**

Xiaobo Zhu, Yue Ouyang, Jiawei Chen, Xinguo Zhu, Xiang Luo, Feili Lai, Hui Zhang,

Yue-E Miao\*, Tianxi Liu

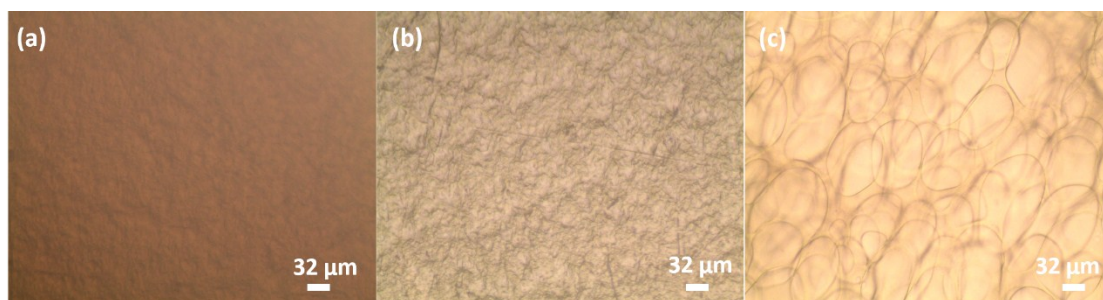

**Fig. S1** Microscope photographs of different electrospinning precursor solutions: (a) PAN, (b) PAA and (c) PAN<sub>6</sub>/PAA<sub>4</sub>.

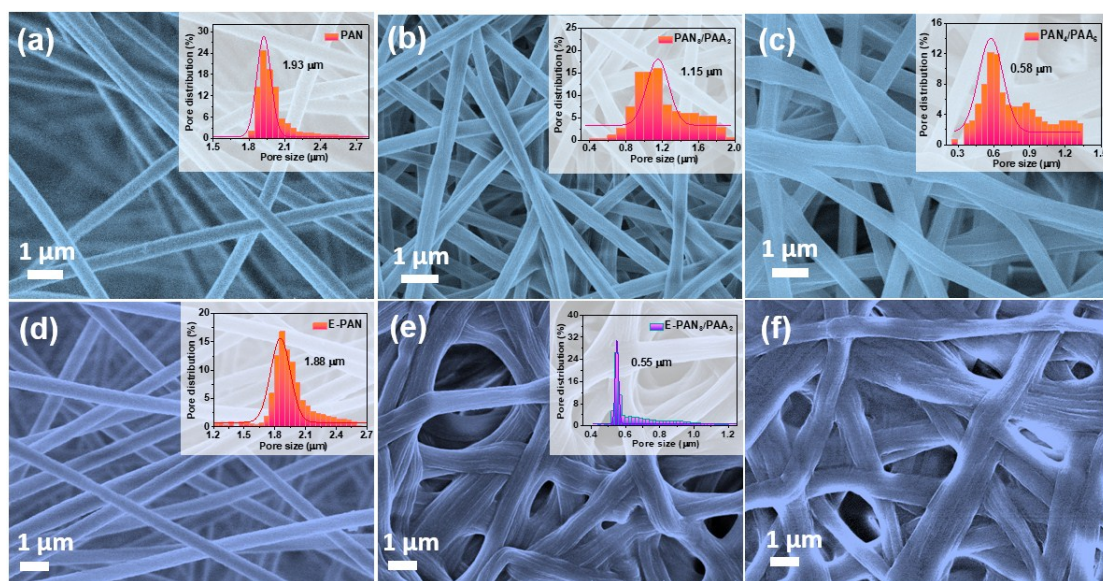

**Fig. S2** SEM images and the corresponding pore size distributions (inset) of different membranes: (a) PAN, (b) PAN<sub>8</sub>/PAA<sub>2</sub>, (c) PAN<sub>4</sub>/PAA<sub>6</sub>, (d) E-PAN, (e) E-PAN<sub>8</sub>/PAA<sub>2</sub>, (f) E-PAN<sub>4</sub>/PAA<sub>6</sub>.

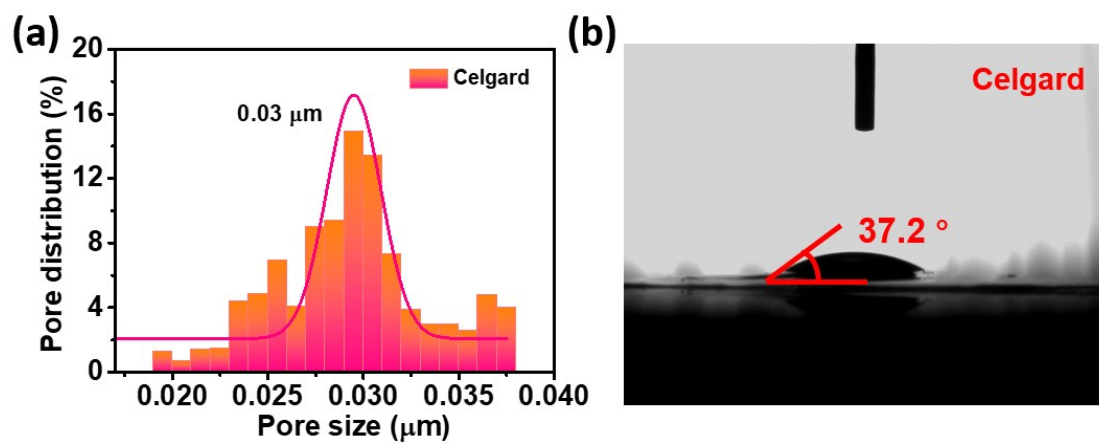

Fig. S3 (a) The pore size distribution, and (b) electrolyte contact angle of Celgard.

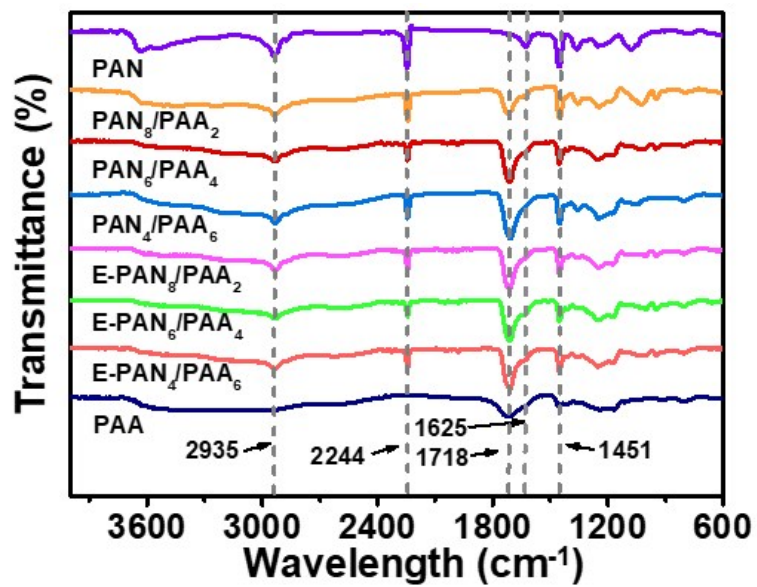

Fig. S4 FTIR spectra of different membranes.

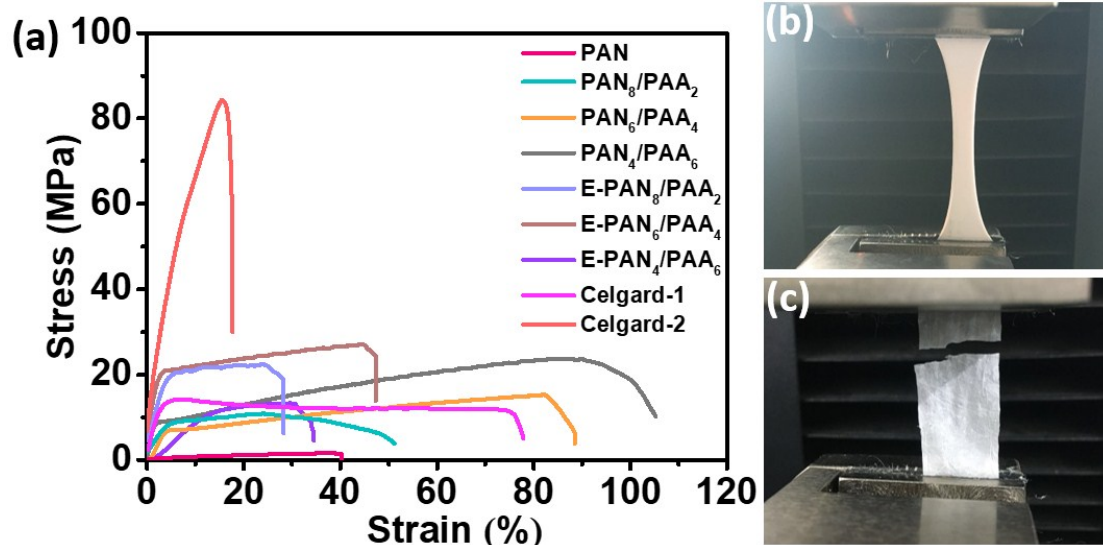

**Fig. S5** (a) Representative stress - strain curves for various membranes. Tensile fracture photos of (b) PAN<sub>6</sub>/PAA<sub>4</sub> and (c) E-PAN<sub>6</sub>/PAA<sub>4</sub> separators.

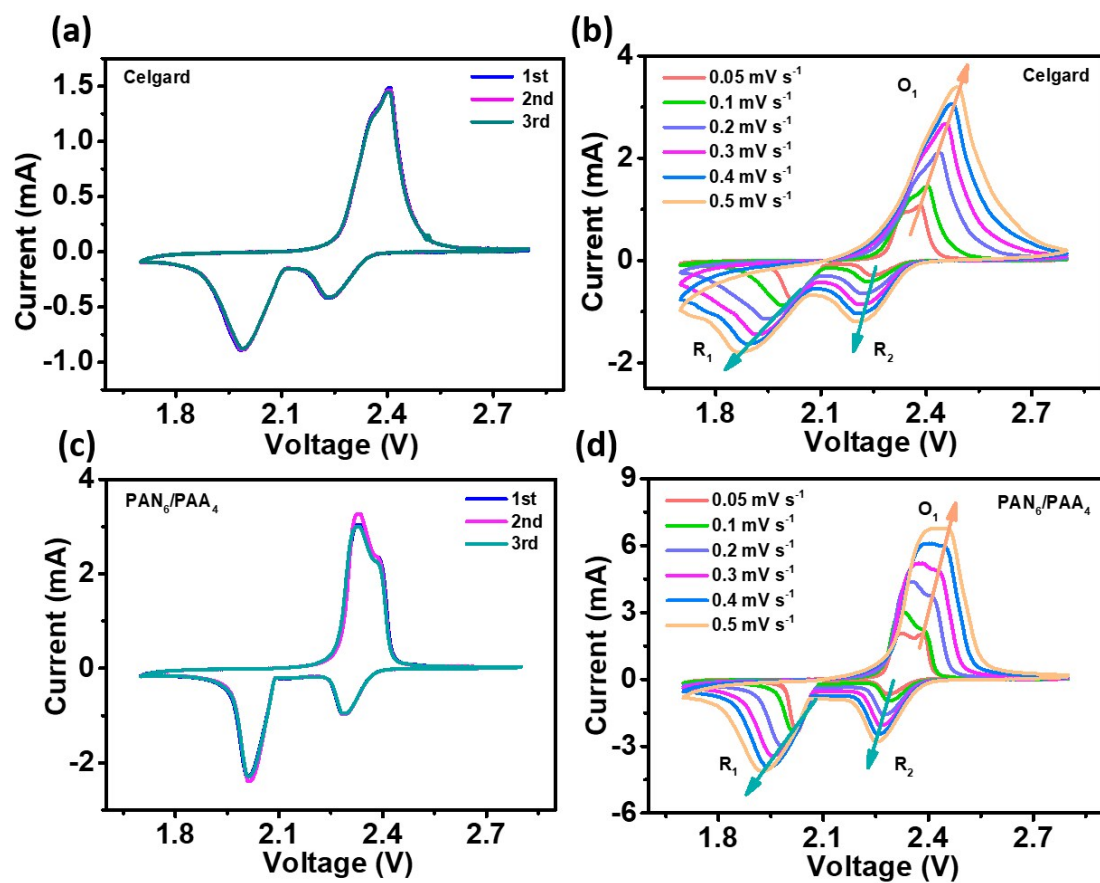

**Fig. S6** CV curves of (a, b) Celgard and (c, d) PAN<sub>6</sub>/PAA<sub>4</sub> separators obtained at a scanning rate of  $0.1 \text{ mV s}^{-1}$  and different scanning rates.

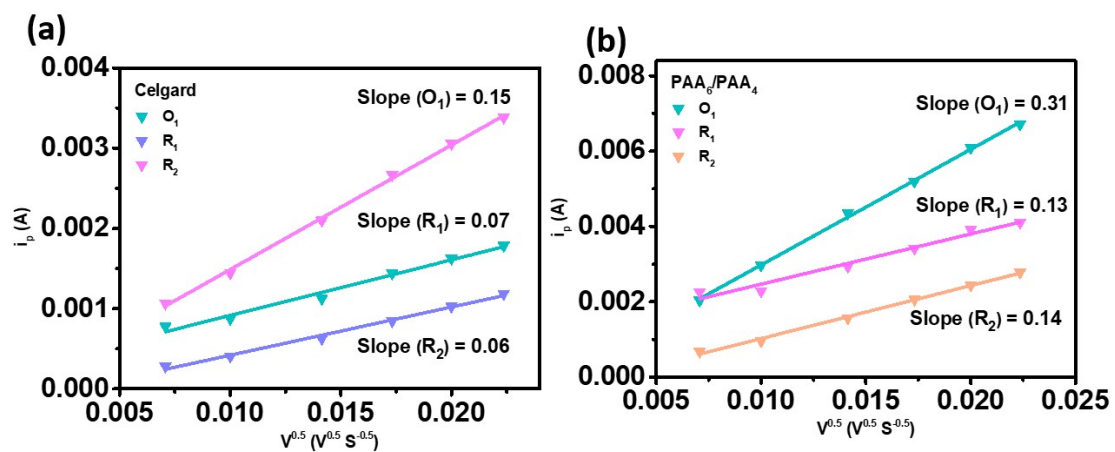

**Fig. S7** Linear fits of the peak currents of Li-S batteries with (a) Celgard and (b) PAN<sub>6</sub>/PAA<sub>4</sub> separators.



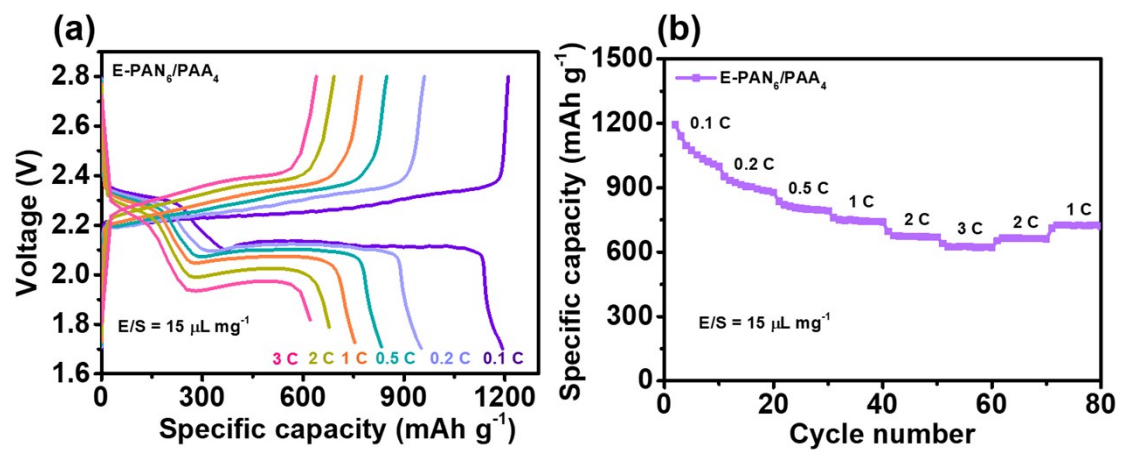

**Fig. S8** Electrochemical performance of the batteries assembled by E-PAN<sub>6</sub>/PAA<sub>4</sub> at a low electrolyte addition (the ratio of electrolyte/sulfur is about 15 μL mg<sup>-1</sup>). (a) First cycle discharge/charge curves and (b) rate performance at 0.1, 0.2, 0.5, 1, 2 and 3 C.

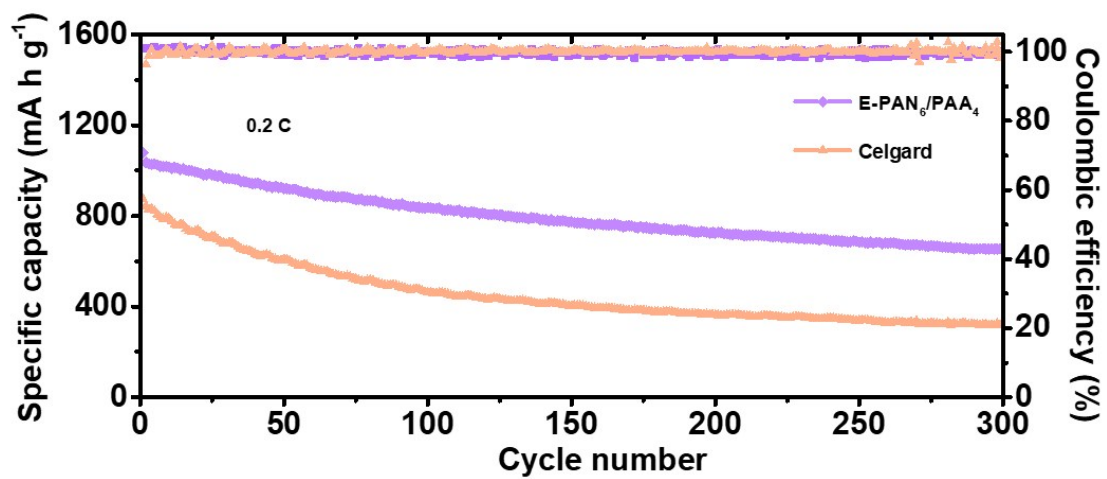

**Fig. S9** The cycling performance of batteries with E-PAN<sub>6</sub>/PAA<sub>4</sub> and Celgard separators at a low rate of 0.2 C.

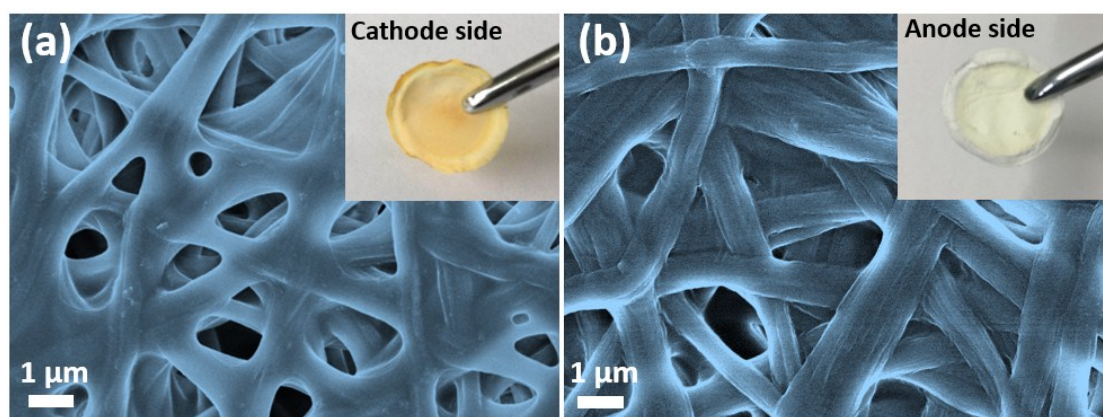

**Fig. S10** SEM images with the corresponding digital photographs (inset) of (a) the cathode side and (b) anode side of E-PAN<sub>6</sub>/PAA<sub>4</sub> separator after 500 cycles of discharge/charge tests.

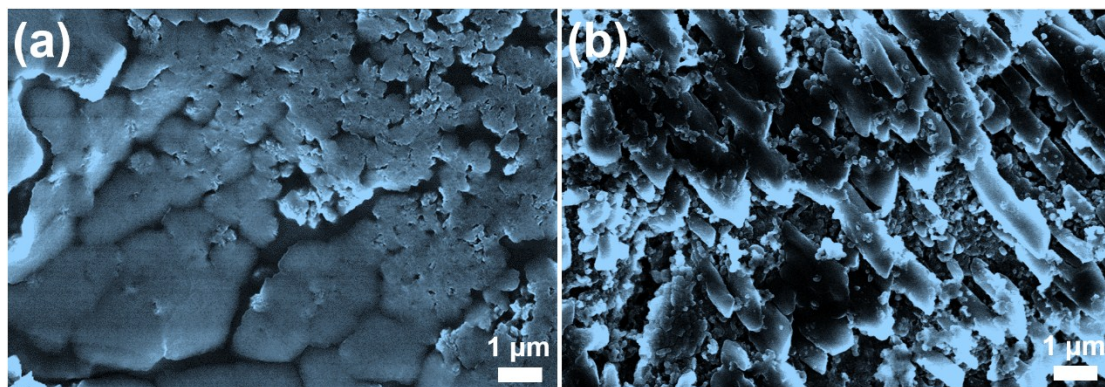

**Fig. S11** SEM images of the Li anodes retrieved from Li-S batteries assembled with (a) E-PAN<sub>6</sub>/PAA<sub>4</sub> and (b) Celgard separators after the cycling test.

**Table S1.** Physical properties of different membranes.

| <b>Samples</b>                           | <b>Thickness<br/>(<math>\mu\text{m}</math>)</b> | <b>Porosity<br/>(%)</b> | <b>Density<br/>(<math>\text{g cm}^{-3}</math>)</b> | <b>Contact angle<br/>(<math>^{\circ}</math>)</b> |
|------------------------------------------|-------------------------------------------------|-------------------------|----------------------------------------------------|--------------------------------------------------|
| Celgard                                  | 26                                              | 40.1                    | 0.57                                               | 37.2                                             |
| PAN                                      | 30                                              | 91.2                    | 0.16                                               | 0                                                |
| PAN <sub>8</sub> /PAA <sub>2</sub>       | 32                                              | 90.5                    | 0.17                                               | 0                                                |
| PAN <sub>6</sub> /PAA <sub>4</sub>       | 33                                              | 87.3                    | 0.15                                               | 0                                                |
| PAN <sub>4</sub> /PAA <sub>6</sub>       | 34                                              | 83.1                    | 0.16                                               | 0                                                |
| E-<br>PAN <sub>8</sub> /PAA <sub>2</sub> | 28                                              | 37.1                    | 0.17                                               | 0                                                |
| E-<br>PAN <sub>6</sub> /PAA <sub>4</sub> | 30                                              | 29.4                    | 0.17                                               | 0                                                |
| E-<br>PAN <sub>4</sub> /PAA <sub>6</sub> | 29                                              | 19.6                    | 0.19                                               | 0                                                |

**Table S2.** TGA analyses for different samples.

| <b>Samples</b>                       | <b>The remaining weight ( wt% )</b> |
|--------------------------------------|-------------------------------------|
| PAN                                  | 53.7                                |
| PAN <sub>8</sub> /PAA <sub>2</sub>   | 43.0                                |
| PAN <sub>6</sub> /PAA <sub>4</sub>   | 34.6                                |
| PAN <sub>4</sub> /PAA <sub>6</sub>   | 34.5                                |
| E-PAN <sub>8</sub> /PAA <sub>2</sub> | 41.2                                |
| E-PAN <sub>6</sub> /PAA <sub>4</sub> | 34.7                                |
| E-PAN <sub>4</sub> /PAA <sub>6</sub> | 31.5                                |
| PAA                                  | 12.5                                |

**Table S3.** Summary of the mechanical properties of different membranes.

| <b>Samples</b>                       | <b>Tensile strength<br/>(MPa)</b> | <b>Elongation<br/>at break (%)</b> | <b>Young's modulus<br/>(MPa)</b> |
|--------------------------------------|-----------------------------------|------------------------------------|----------------------------------|
| PAN                                  | $1.61 \pm 0.27$                   | $40.17 \pm 4.12$                   | $4 \pm 1$                        |
| PAN <sub>8</sub> /PAA <sub>2</sub>   | $10.88 \pm 1.96$                  | $53.40 \pm 4.31$                   | $167 \pm 21$                     |
| PAN <sub>6</sub> /PAA <sub>4</sub>   | $15.82 \pm 1.31$                  | $82.22 \pm 2.14$                   | $485 \pm 26$                     |
| PAN <sub>4</sub> /PAA <sub>6</sub>   | $23.75 \pm 2.19$                  | $105.23 \pm 2.51$                  | $541 \pm 43$                     |
| E-PAN <sub>8</sub> /PAA <sub>2</sub> | $22.41 \pm 3.07$                  | $28.24 \pm 1.78$                   | $396 \pm 34$                     |
| E-PAN <sub>6</sub> /PAA <sub>4</sub> | $27.17 \pm 3.36$                  | $47.33 \pm 1.59$                   | $637 \pm 63$                     |
| E-PAN <sub>4</sub> /PAA <sub>6</sub> | $13.28 \pm 1.34$                  | $34.50 \pm 1.34$                   | $95 \pm 32$                      |
| Celgard-1                            | $14.09 \pm 2.16$                  | $78.64 \pm 4.87$                   | $485 \pm 47$                     |
| Celgard-2                            | $84.34 \pm 4.12$                  | $18.44 \pm 1.86$                   | $642 \pm 69$                     |

**Table S4.** Fitted values for the equivalent circuit elements of the electrochemical impedance spectroscopy.

| Parameters                           | $R_0$ ( $\Omega$ ) | $R_{ct}$ ( $\Omega$ ) | $R_{sf}$ ( $\Omega$ ) |
|--------------------------------------|--------------------|-----------------------|-----------------------|
| PAN                                  | 3.5                | 3.9                   | ~                     |
| PAN <sub>8</sub> /PAA <sub>2</sub>   | 4.9                | 7.2                   | 2.7                   |
| PAN <sub>6</sub> /PAA <sub>4</sub>   | 6.5                | 8.4                   | 13.2                  |
| PAN <sub>4</sub> /PAA <sub>6</sub>   | 5.0                | 11.4                  | 9.7                   |
| E-PAN <sub>8</sub> /PAA <sub>2</sub> | 14.4               | 23.8                  | 13.6                  |
| E-PAN <sub>6</sub> /PAA <sub>4</sub> | 15.6               | 32.7                  | 15.7                  |
| E-PAN <sub>4</sub> /PAA <sub>6</sub> | 33.1               | 44.2                  | 19.3                  |
| Celgard                              | 8.7                | 12.4                  | 14.4                  |



**Table S5.** Summary of the Li<sup>+</sup> diffusion coefficient ( $D_{Li^+}$ ) for Celgard, PAN<sub>6</sub>/PAA<sub>4</sub> and E-PAN<sub>6</sub>/PAA<sub>4</sub> separators.

| <b>Parameters</b>                                                    | <b>Celgard</b>         | <b>PAN<sub>6</sub>/PAA<sub>4</sub></b> | <b>E-PAN<sub>6</sub>/PAA<sub>4</sub></b> |
|----------------------------------------------------------------------|------------------------|----------------------------------------|------------------------------------------|
| $D_{Li^+}$ at peak R <sub>1</sub> (cm <sup>2</sup> s <sup>-1</sup> ) | 6.62×10 <sup>-15</sup> | 2.28×10 <sup>-14</sup>                 | 8.65×10 <sup>-15</sup>                   |
| $D_{Li^+}$ at peak R <sub>2</sub> (cm <sup>2</sup> s <sup>-1</sup> ) | 4.87×10 <sup>-15</sup> | 2.65×10 <sup>-14</sup>                 | 4.87×10 <sup>-15</sup>                   |
| $D_{Li^+}$ at peak O <sub>1</sub> (cm <sup>2</sup> s <sup>-1</sup> ) | 3.04×10 <sup>-14</sup> | 1.30×10 <sup>-13</sup>                 | 3.46×10 <sup>-14</sup>                   |

**Table S6.** Comparison of the electrochemical performance of this work with previous works involving different separators using carbon-sulfur cathodes in Li-S batteries.

| Separator                                             | Sulfur (%) | Initial capacity (mA h g <sup>-1</sup> ) | Rate capability (mA h g <sup>-1</sup> ) | Fading rate per cycle (%)                    | Refs             |
|-------------------------------------------------------|------------|------------------------------------------|-----------------------------------------|----------------------------------------------|------------------|
| MoS <sub>2</sub> /Celgard                             | 65         | 1471<br>(0.1 C)                          | 550<br>(1 C)                            | 0.08<br>(0.5 C, 600 cycles)                  | 1                |
| Black phosphorus/Celgard                              | 80         | 930<br>(0.4 A g <sup>-1</sup> )          | 623<br>(3.5 A g <sup>-1</sup> )         | 0.14<br>(0.4 A g <sup>-1</sup> , 100 cycles) | 2                |
| KB@Ir/Celgard <sup>a</sup>                            | 75         | 1600<br>(0.1 C)                          | 653<br>(2 C)                            | 0.11<br>(1 C, 500 cycles)                    | 3                |
| Janus cation exchange membranes                       | 60         | 1227<br>(0.05 C)                         | 610<br>(2 C)                            | 0.24<br>(0.2 C, 100 cycles)                  | 4                |
| Graphene/polypropylene/Al <sub>2</sub> O <sub>3</sub> | 60         | 1067<br>(0.2 C)                          | 780<br>(2 C)                            | 0.25<br>(0.2 C, 100 cycles)                  | 5                |
| PAA-SWNT/Celgard <sup>b</sup>                         | 65         | 1130<br>(0.1 C)                          | 592<br>(2 C)                            | 0.13<br>(1 C, 200 cycles)                    | 6                |
| COF@CNT/Celgard <sup>c</sup>                          | 75         | 1130<br>(0.2 C)                          | 600<br>(10 C)                           | 0.05<br>(2 C, 300 cycles)                    | 7                |
| PAA/Celgard <sup>d</sup>                              | 70         | 713<br>(0.1 C)                           | 373<br>(2 C)                            | 0.07<br>(0.5 C, 600 cycles)                  | 8                |
| GO membrane/Celgard                                   | 63         | 920<br>(0.1 C)                           | 580<br>(2 C)                            | 0.26<br>(0.1 C, 100 cycles)                  | 9                |
| <b>E-PAN/PAA</b>                                      | <b>60</b>  | <b>1232</b><br><b>(0.1 C)</b>            | <b>563</b><br><b>(2 C)</b>              | <b>0.03</b><br><b>(1 C, 500 cycles)</b>      | <b>This work</b> |

KB@Ir/Celgard<sup>a</sup>: Ketchen Black and Ir nanoparticle modified Celgard.

PAA-SWNT/Celgard <sup>b</sup>: Poly(acrylic acid) coated single-walled carbon nanotube film on Celgard.

COF@CNT/Celgard <sup>c</sup>: Microporous covalent organic framework (COF) net and mesoporous carbon nanotube (CNT) net modified Celgard.

PAA/Celgard <sup>d</sup>: Poly(acrylic acid) modified Celgard.

## References

1. Z. A. Ghazi, X. He, A. M. Khattak, N. A. Khan, B. Liang, A. Iqbal, J. X. Wang, H. Sin, L. S. Li and Z. Y. Tang, *Adv. Mater.*, 2017, **29**, 1606817.
2. J. Sun, Y. M. Sun, M. Pasta, G. M. Zhou, Y. Z. Li, W. Liu, F. Xiong and Y. Cui, *Adv. Mater.*, 2016, **28**, 9797-9803.
3. P. J. Zuo, J. F. Hua, M. X. He, H. Zhang, Z. Y. Qian, Y. L. Ma, C. Y. Du, X. Q. Cheng, Y. Z. Gao and G. P. Yin, *J. Mater. Chem. A*, 2017, **5**, 10936-10945.
4. Z. Li, Y. Han, J. H. Wei, W. Q. Wang, T. T. Cao, S. M. Xu and Z. H. Xu, *ACS Appl. Mater. Interfaces*, 2017, **9**, 44776-44781.
5. R. S. Song, R. P. Fang, L. Wen, Y. Shi, S. G. Wang and F. Li, *J. Power Sources*, 2016, **301**, 179-186.
6. J. H. Kim, J. Seo, J. Choi, D. Shin, M. Carter, Y. Jeon, C. W. Wang, L. B. Hu and U. Paik, *ACS Appl. Mater. Interfaces*, 2016, **8**, 20092-20099.
7. J. T. Yoo, S. J. Cho, G. Y. Jung, S. H. Kim, K. H. Choi, J. H. Kim, C. K. Lee, S. K. Kwak and S. Y. Lee, *Nano Lett.*, 2016, **16**, 3292-3300.
8. S. L. Song, L. Shi, S. Y. Lu, Y. C. Pang, Y. K. Wang, M. Zhu, D. W. Ding and S. J. Ding, *J. Membr. Sci.*, 2018, **563**, 277-283.
9. J. Q. Huang, T. Z. Zhuang, Q. Zhang, H. J. Peng, C. M. Chen and F. Wei, *ACS Nano*, 2015, **9**, 3002-3011.
